# Supplementary material
Source: publisher figshare collection journal article supplement (https://frontiersin.figshare.com/ndownloader/files/24169919)
Supplement: Supplementary file [file 24169919]

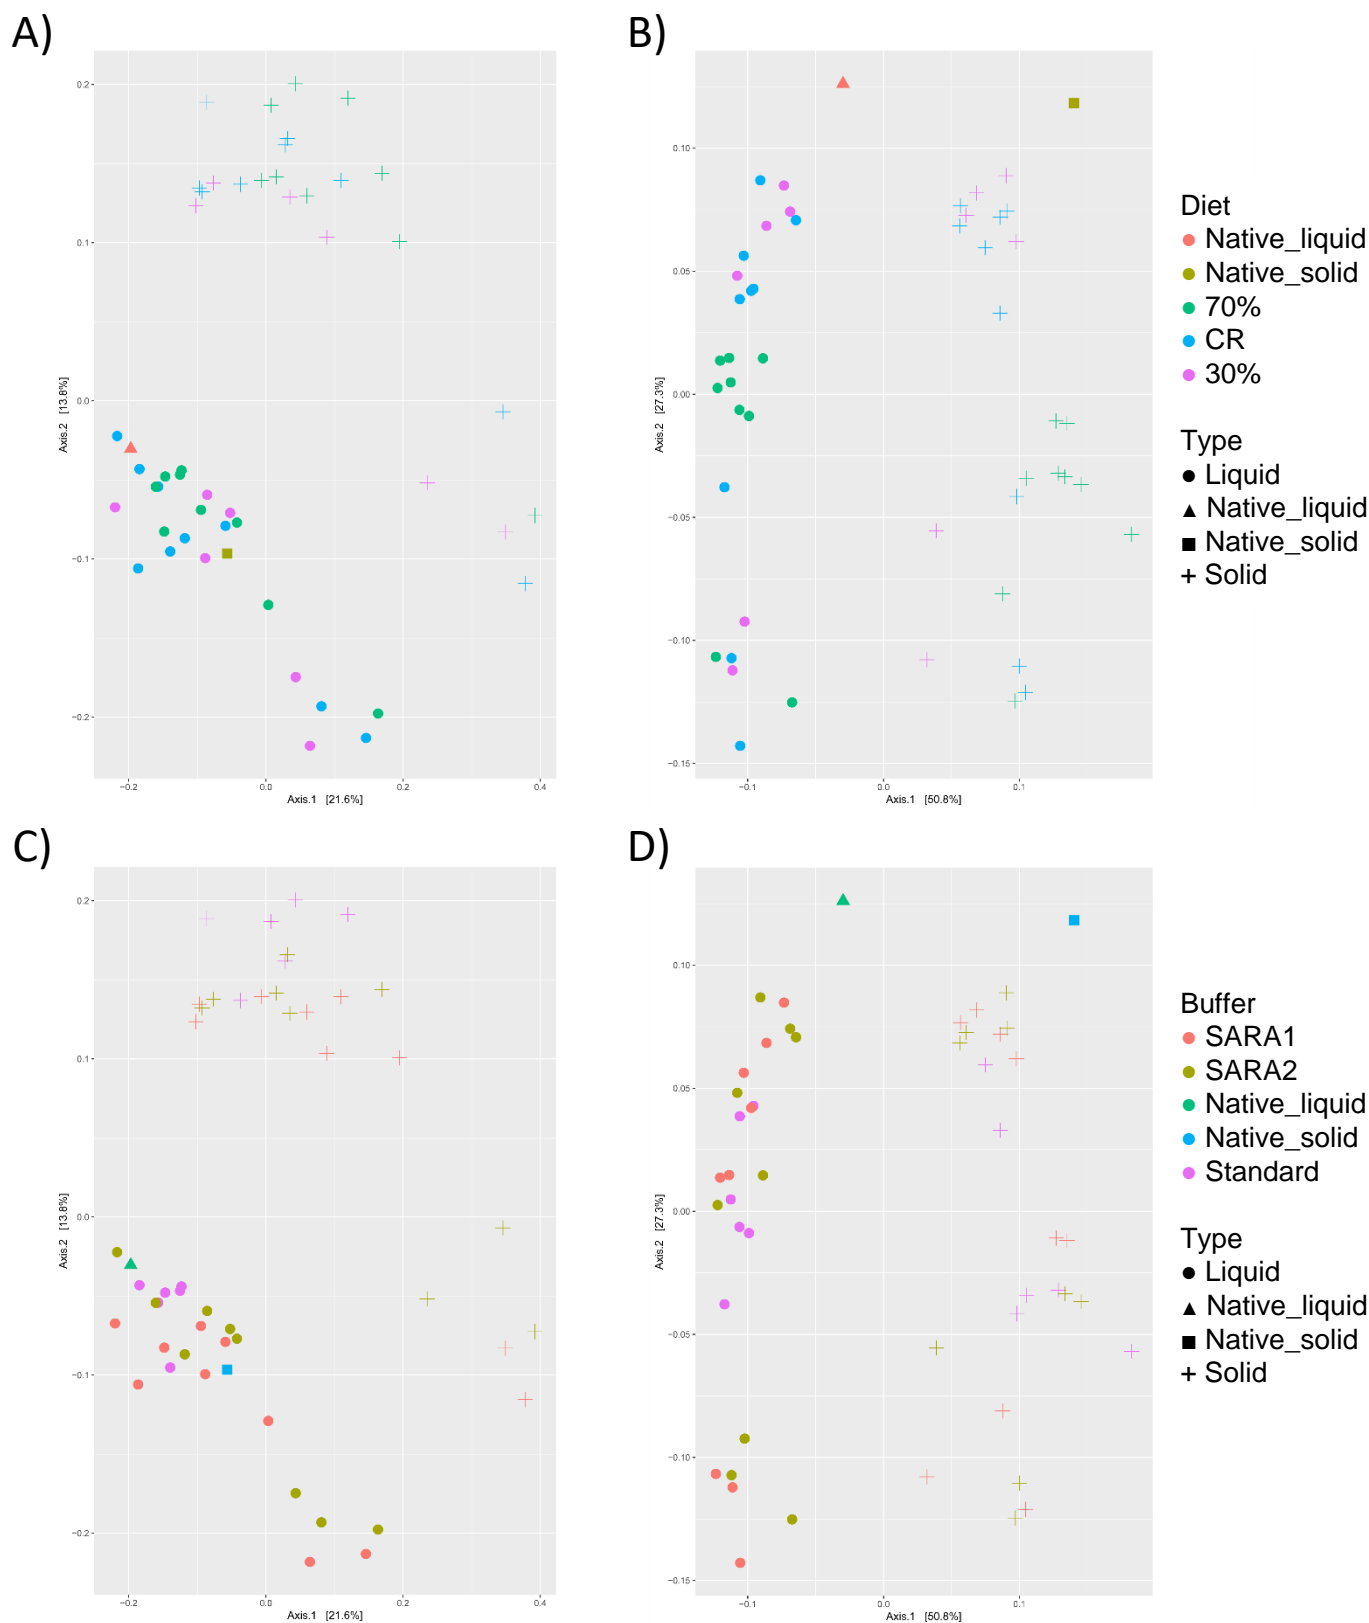

**Supplementary Figure 6:** Unweighted (A) and weighted (B) UniFrac distances among samples labeled according to the diet and unweighted (C) and weighted (D) UniFrac distances labeled according to the buffer type.
